# Supplementary material for: Concomitant KRAS mutations attenuate sensitivity of non-small cell lung cancer cells to KRAS G12C inhibition
Source: PubMed Central journal article supplement (PMC8854729; doi:10.1038/s41598-022-06369-3), 2022-02-17
Supplement: 41598_2022_6369_MOESM1_ESM.pdf [file 41598_2022_6369_MOESM1_ESM.pdf]

## Supplementary information

### **Concomitant *KRAS* mutations attenuate sensitivity of non-small cell lung cancer cells to *KRAS* G12C inhibition**

Tereza Vaclova<sup>1</sup>, Atanu Chakraborty<sup>2</sup>, James Sherwood<sup>3</sup>, Sarah Ross<sup>2</sup>, Danielle Carroll<sup>1</sup>, J. Carl Barrett<sup>4</sup>, Julian Downward<sup>5</sup>, Elza C. de Bruin<sup>1\*</sup>

<sup>1</sup>Translational Medicine, Oncology, AstraZeneca, Cambridge CB4 0WG, UK.

<sup>2</sup>Bioscience, Oncology, AstraZeneca, Cambridge CB2 0RE, UK.

<sup>3</sup>Precision Medicine and Biosamples, BioPharmaceutical, AstraZeneca, Cambridge CB4 0WG, UK.

<sup>4</sup>Translational Medicine, Oncology, AstraZeneca, Waltham, MA 02451, USA.

<sup>5</sup>Oncogene Biology, Francis Crick Institute, London NW1 1AT, UK.

\*To whom correspondence should be addressed: [elza.de-bruin@astrazeneca.com](mailto:elza.de-bruin@astrazeneca.com)

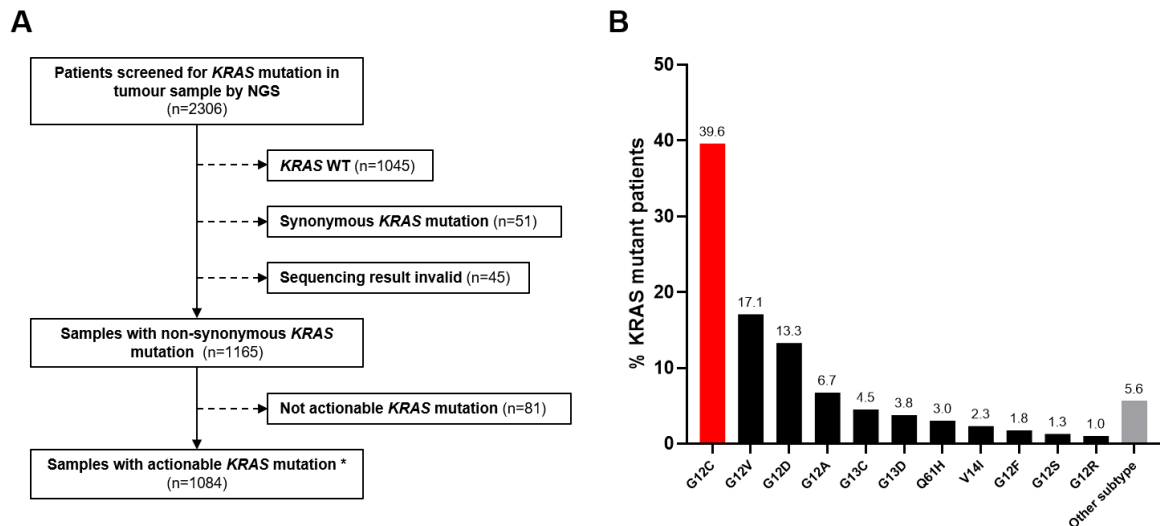

**Fig S1: Tumour *KRAS* genotype analysis in patients screened for enrolment into the Select-1 trial. (A)** From the 2306 screened patients, in total 1084 patients had detectable non-synonymous hotspot mutation in the *KRAS* gene. \* Only mutations with 15+ entries in lung tissue in the COSMIC database (<https://cancer.sanger.ac.uk/cosmic>) and/or classified as pathogenic or likely pathogenic in ClinVar (<https://www.ncbi.nlm.nih.gov/clinvar/>) were considered as actionable. Mutations reported less than 15-times in lung tissue in COSMIC and not recognised by the ClinVar database were considered as not actionable *KRAS* mutations. (B) Histogram of a frequency of the main *KRAS* hotspot mutations in 1084 *KRAS* mutant tumour samples. Only mutations detected in  $\geq 1\%$  samples are specified. Only single *KRAS* mutants are shown in the counts. If more than one *KRAS* mutation/sample was detected the combination was considered as a separate subtype (details in **Table S1**). Individual multiple mutant subtypes were found in  $\leq 1\%$  samples and thus are included in the “other subtype” group.

**Table S1: List of all actionable *KRAS* mutant subtypes detected in 1084 tumour samples.** Samples with single or multiple *KRAS* mutations are specified.

| KRAS protein change | # positive samples | % positive samples |
|---------------------|--------------------|--------------------|
| G12C                | 429                | 39.6               |
| G12V                | 185                | 17.1               |
| G12D                | 144                | 13.3               |
| G12A                | 73                 | 6.7                |
| G13C                | 49                 | 4.5                |
| G13D                | 41                 | 3.8                |
| Q61H                | 33                 | 3.0                |
| V14I                | 25                 | 2.3                |
| G12F                | 19                 | 1.8                |
| G12S                | 14                 | 1.3                |
| G12R                | 11                 | 1.0                |
| G12C & V14I         | 10                 | 0.9                |
| Q61L                | 9                  | 0.8                |
| G12C & G12V         | 6                  | 0.6                |
| G13V                | 4                  | 0.4                |
| Q61R                | 4                  | 0.4                |
| G12D & V14I         | 3                  | 0.3                |
| A59T                | 2                  | 0.2                |
| G12A & V14I         | 2                  | 0.2                |
| G12D & G13S         | 2                  | 0.2                |
| G12S & V14I         | 2                  | 0.2                |
| G12V & V14I         | 2                  | 0.2                |
| G13S                | 2                  | 0.2                |
| Q61K                | 2                  | 0.2                |
| A59T & V14I         | 1                  | 0.1                |
| G12A & G12R         | 1                  | 0.1                |
| G12A & G12V         | 1                  | 0.1                |
| G12F & V14I         | 1                  | 0.1                |
| G12F & G12C         | 1                  | 0.1                |
| G12C & G13D         | 1                  | 0.1                |
| G12D & G12V         | 1                  | 0.1                |
| G12D & G13C         | 1                  | 0.1                |
| G12D & V14I & Q61H  | 1                  | 0.1                |
| G12V & Q61H         | 1                  | 0.1                |
| G13C & G13V         | 1                  | 0.1                |
| <b>Total</b>        | <b>1084</b>        | <b>100</b>         |

**A**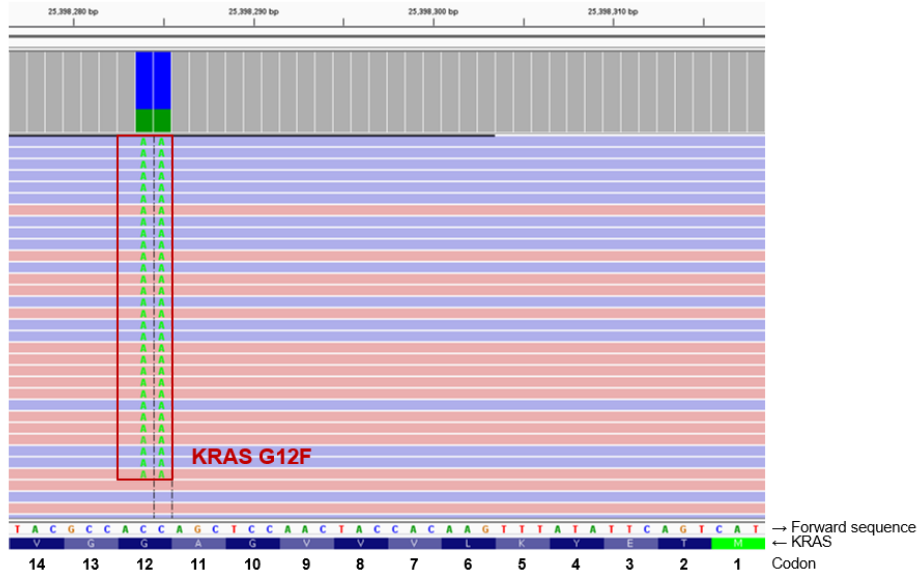**B**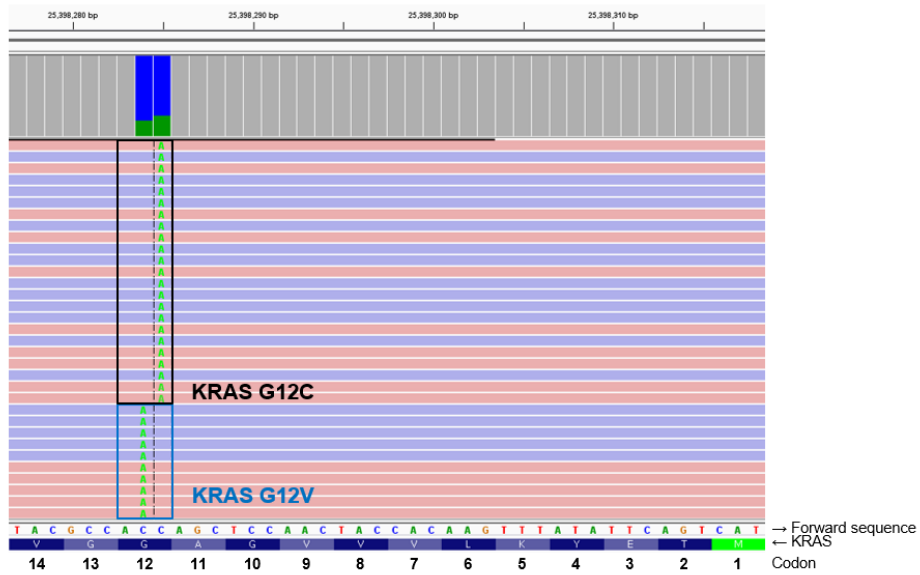**C**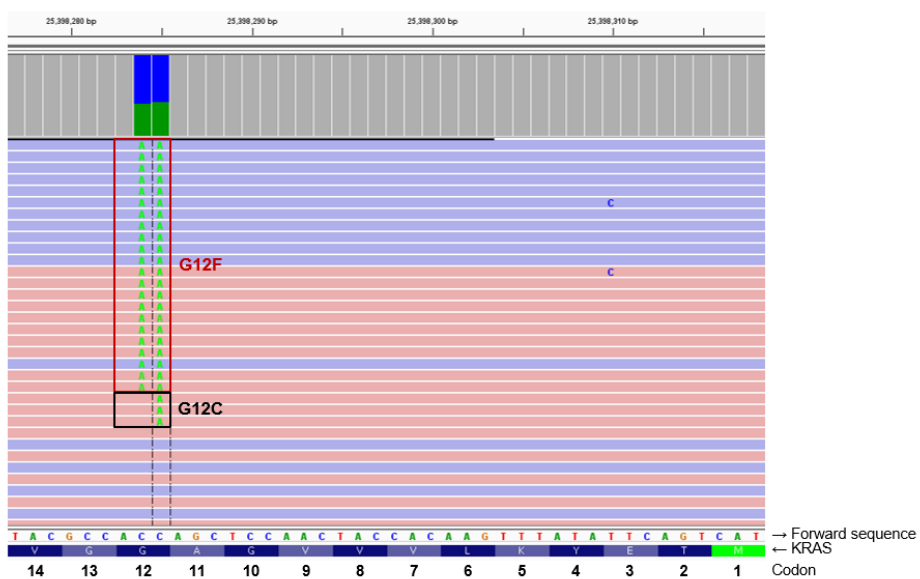

**Fig S2: Example sequencing results of c.34G>T and c.35G>T co-occurring mutations in *KRAS*.** (A) Co-occurrence of c.34G>T and c.35G>T in cis, i.e. on the same sequencing read, results in the G12F amino acid change. (B) Co-occurrence of c.34G>T and c.35G>T in trans, i.e. on distinct sequencing reads, results in a translation to both G12C and G12V mutant proteins, which can be present in the same cell or in different cell clones within the tested tissue. (C) Co-occurrence of *KRAS* G12F and G12C mutations in 1 tumour sample. Number of sequencing reads was downsampled (as marked by the black line under the coverage track in A, B, C) for a better visualisation.

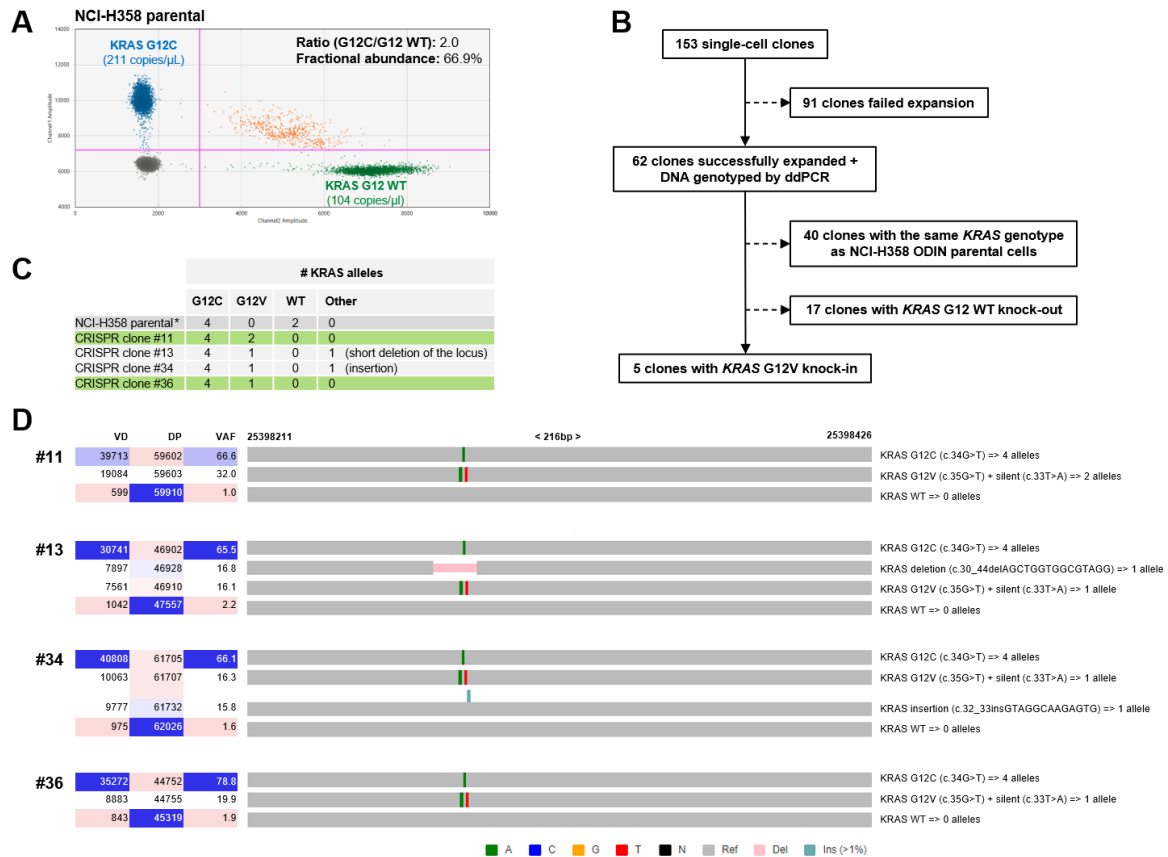

**Fig S3: Establishment of NCI-H358\_28D5 *KRAS* G12C+V double mutant cell line models.** (A) *KRAS* codon 12 genotyping of the NCI-H358\_28D5 parental cell line by ddPCR. Blue droplet population represents G12C-positive DNA molecules, green droplets mark the G12 WT DNA molecules, orange droplets carry both G12C and G12 WT DNA molecules. Ratio of G12C to G12 WT molecules is 2. (B) Individual CRISPR clone selection flowchart. In total 153 single-cell clones were isolated and cultured from the heterogeneous CRISPR cell pool. 62 clones (41%) were successfully expanded, cryopreserved and genotyped for *KRAS* G12V knock-in by ddPCR. 17 out of 62 genotyped clones (27%) exhibited knock-out of WT (wild type) *KRAS* G12 locus, which is an expected result as small insertions/deletions are a common feature of CRISPR knock-in experiments due to a high rate of an imprecise repair by the non-homologous end joining (NHEJ) pathway (1). (C) *KRAS* amplicon sequencing of four NCI-H358\_28D5\_G12V single cell clones, which were positive for G12V knock-in by a ddPCR assay. Clones #11 and #36 were both positive for the G12V knock-in and did not show any additional insertions/deletions, unlike clones #13 and #34. Green colour marks clones which were selected for future *in vitro* experiments. \* *KRAS* genotyping the parental NCI-H358\_28D5 cells was performed by ddPCR, as shown in A. (D) Frequency of individual alterations in the *KRAS* amplicon detected by NGS of four NCI-H358\_28D5\_G12V CRISPR cell clones. NGS confirmed the

presence of KRAS G12V in all four tested clones. KRAS G12V (c.35G>T) is accompanied by a silent mutation (c.33T>A) in order to prevent additional cleavage of knocked-in allele by the CRISPR/Cas9 machinery. In addition, small insertions/deletions were detected in clones #34 and #13, respectively, a common feature of CRISPR knock-in experiments due to a high rate of an imprecise repair by the non-homologous end joining (NHEJ) pathway. The amplicon length was 216bp. VD, variant depth; DP, read depth; VAF, variant allele frequency.

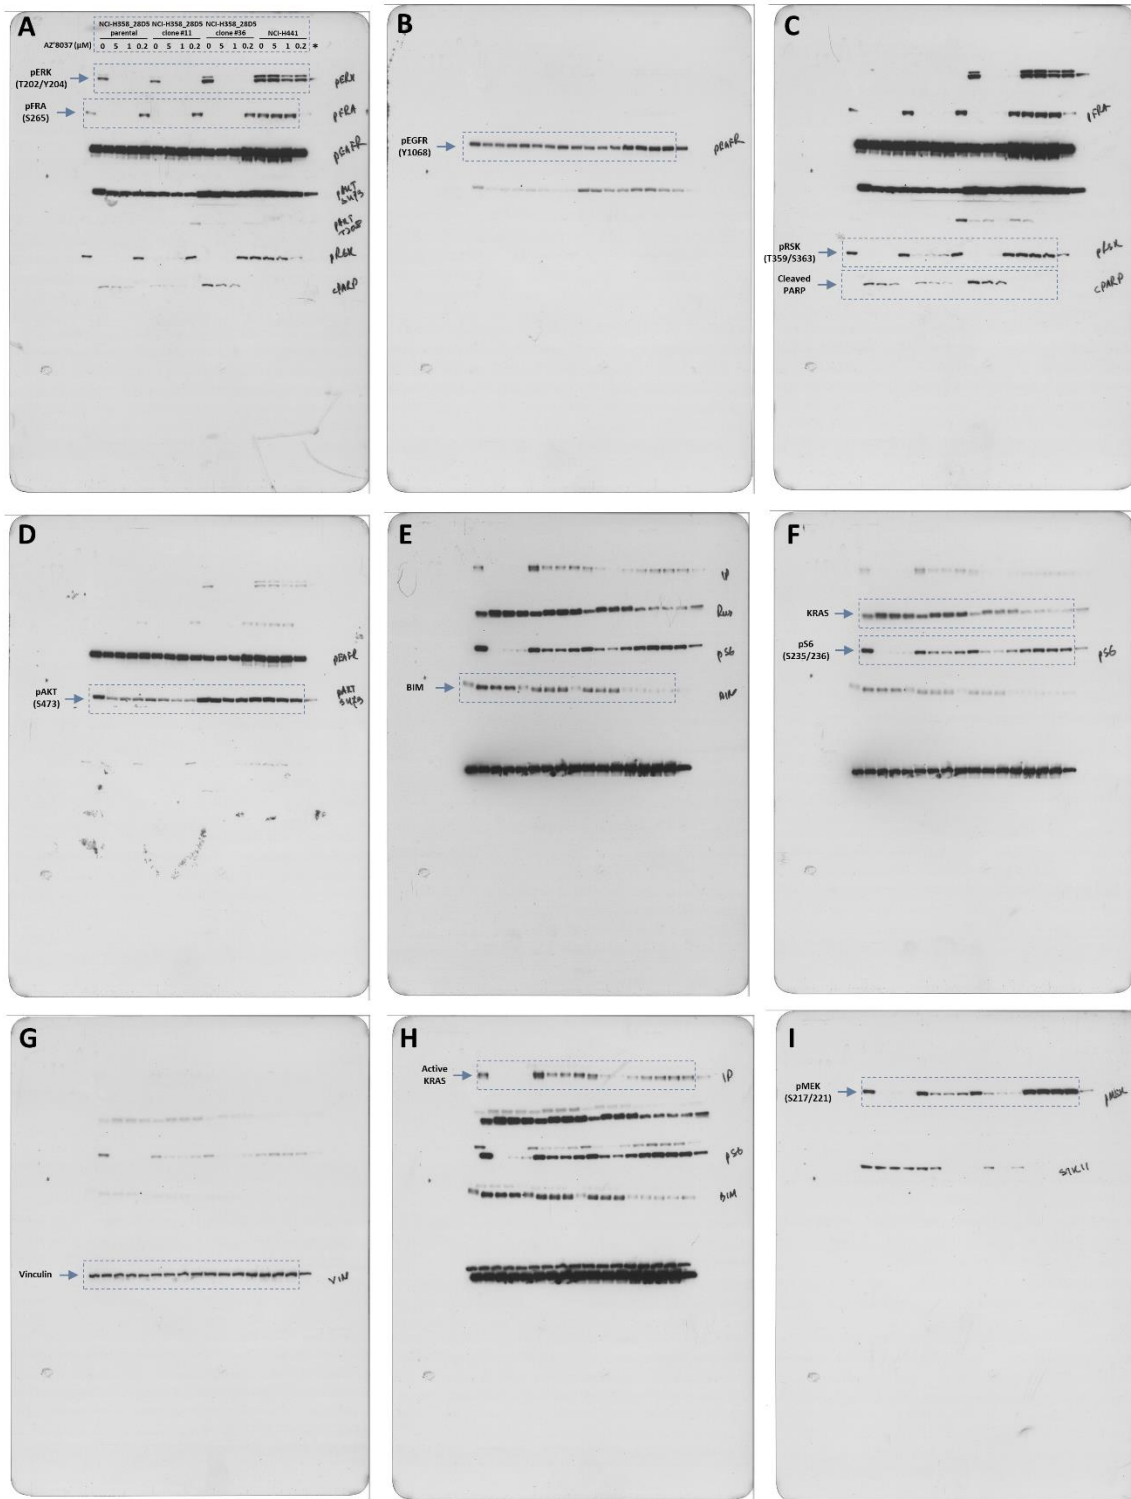

**Fig S4: Full-length blots showing immunoblot analysis of cellular extract from *KRAS* mutant cell line models.** Cells grown in 2D monolayer and treated with vehicle (DMSO; marked as 0) or the indicated concentrations of AZ'8037 for 16 hours. Blue dashed boxes show selection used for Fig 2C. No sample has been loaded in the last well marked with asterisk in the treatment conditions section in (A) due to previous observation of an insufficient transfer at that position. Individual scans show results for (A)



pERK (T202/Y204) and pFRA (S265), (B) pEGFR (Y1068), (C) pRSK (T359/S363) and cleaved PARP, (D) pAKT (S473), (E) BIM, (F) KRAS and pS6 (S235/236), (G) vinculin, (H) active KRAS, (I) pMEK (S217/221).



## References

1. Ryu SM, Hur JW, Kim K. Evolution of CRISPR towards accurate and efficient mammal genome engineering. *BMB Rep.* 2019;52(8):475-81.
